# Supplementary material for: Breaking supercontinents; no need to choose between passive oractive
Source: Copernicus journal article supplement (doi:10.5194/se-2017-14), 2017-02-08
Supplement: Supplementary file 1 [file se-2017-14-supplement.zip]

Archive with 2 entries (2 files):
- Caption_to_Supplementary_Animation_1.pdf
- Supplementary_Animation_1_Case1.mp4
