# Supplementary material for: Breaking supercontinents; no need to choose between passive oractive
Source: Copernicus journal article supplement (doi:10.5194/se-2017-14), 2017-02-08
Supplement: Supplementary file 1 [file se-2017-14-supplement.zip › Caption_to_Supplementary_Animation_1.pdf]

### **Caption to Supplementary Animation**

<File: Supplementary\_Animation\_1\_Case1.mp4>

Supplementary Animation 1. Visualisation of case 1. comprising the same model as Figure 2 panels 1-9 from a different orientation. Note the motion of the hot and cold anomalies on the surface towards the avalanche.
